# *GmFT4*, a Homolog of *FLOWERING LOCUS T*, Is Positively Regulated by *E1* and Functions as a Flowering Repressor in Soybean

Hong Zhai<sup>1</sup>, Shixiang Lü<sup>1</sup>, Shuang Liang<sup>2</sup>, Hongyan Wu<sup>1</sup>, Xingzheng Zhang<sup>1</sup>, Baohui Liu<sup>1</sup>, Fanjiang Kong<sup>1</sup>, Xiaohui Yuan<sup>1</sup>, Jing Li<sup>2</sup>, Zhengjun Xia<sup>1\*</sup>

**1** Key Laboratory of Soybean Molecular Design Breeding, Northeast Institute of Geography and Agroecology, Chinese Academy of Sciences, Harbin, Heilongjiang, China, **2** College of Life Science, Northeast Agricultural University, Harbin, Heilongjiang, China

## Abstract

The major maturity gene *E1* has the most prominent effect on flowering time and photoperiod sensitivity of soybean, but the pathway mediated by *E1* is largely unknown. Here, we found the expression of *GmFT4*, a homolog of *Flowering Locus T*, was strongly up-regulated in transgenic soybean overexpressing *E1*, whereas expression of flowering activators, *GmFT2a* and *GmFT5a*, was suppressed. *GmFT4* expression was strongly up-regulated by long days exhibiting a diurnal rhythm, but down-regulated by short days. Notably, the basal expression level of *GmFT4* was elevated when transferred to continuous light, whereas repressed when transferred to continuous dark. *GmFT4* was primarily expressed in fully expanded leaves. Transcript abundance of *GmFT4* was significantly correlated with that of functional *E1*, as well as flowering time phenotype in different cultivars. Overexpression of *GmFT4* delayed the flowering time in transgenic *Arabidopsis*. Taken together, we propose that *GmFT4* acts downstream of *E1* and functions as a flowering repressor, and the balance of two antagonistic factors (*GmFT4* vs *GmFT2a/5a*) determines the flowering time of soybean.

**Citation:** Zhai H, Lü S, Liang S, Wu H, Zhang X, et al. (2014) *GmFT4*, a Homolog of *FLOWERING LOCUS T*, Is Positively Regulated by *E1* and Functions as a Flowering Repressor in Soybean. PLoS ONE 9(2): e89030. doi:10.1371/journal.pone.0089030

**Editor:** David E. Somers, Ohio State University, United States of America

**Received:** September 14, 2013; **Accepted:** January 19, 2014; **Published:** February 19, 2014

**Copyright:** © 2014 Zhai et al. This is an open-access article distributed under the terms of the Creative Commons Attribution License, which permits unrestricted use, distribution, and reproduction in any medium, provided the original author and source are credited.

**Funding:** This work was supported by National Natural Science Foundation of China (31271742 and 31301338), Chinese Academy of Sciences (Hundred Talents Program, KZCX2-EW-303, XDA08010105), and Natural Science Foundation of Heilongjiang Province of China (ZD201120). The funders had no role in study design, data collection and analysis, decision to publish, or preparation of the manuscript.

**Competing Interests:** The authors have declared that no competing interests exist.

\* E-mail: Xiazhj@neigaehrb.ac.cn

## Introduction

The transition from vegetative to reproductive stage is a critical event in the life cycle for seed-propagated plants. Seasonal changes in day length are perceived in leaves, while the responses occur at the apex by long-distance signaling. Florigen, the molecule(s) that migrates from leaves to apical meristem to initiate flowering was proposed by Russian plant physiologist Mikhail Chailakhyan (1937) based on grafting experiments. Recent advances made in *Arabidopsis* (*Arabidopsis thaliana*) and rice (*Oryza sativa*) have demonstrated that FLOWERING LOCUS T (FT) protein produced in leaves, is a florigen that moves through the phloem to the shoot apical meristem (SAM) [1–4].

The FT protein, a phosphatidylethanolamine-binding (PEBP)-related kinase, interacts with Flowering Locus D (FD), a bZIP protein, at the vegetative shoot apex. The FT–FD complex subsequently functions to specify flower meristem identity by activating floral meristem genes that start the flowering process, such as *APETALA1*, *FRUITFUL* and *SEPALATA3* [5–7].

The expression of FT is principally regulated by the *CONSTANS* (*CO*) gene, a central regulator that accelerates flowering in the long day pathway (for long day plants), which is modulated by the circadian clock and day length [8]. The photoperiodic response in *Arabidopsis thaliana* requires the precise regulation of *CO* and FT expression coinciding with a photosensitive phase [9–10].

Apart from FT, two other PEBP family members, *TWIN SISTER OF FT* (*TSF*) and *TERMINAL FLOWER 1* (*TFL1*), are also involved in the control of flowering. *TSF* is a flowering activator, and *TFL1* is a flowering repressor. *TSF* is the closest homolog of FT in *Arabidopsis* and is thought to be an additional integrator of flowering time pathways. The mRNA levels of *TSF* and FT showed similar patterns of diurnal oscillation and response to photoperiods [11]. Both FT and *TSF* are expressed in the vascular tissue of plant leaves but are spatially different, with *TSF* expressed mainly in hypocotyls while FT expressed in cotyledons and leaves [11,12]. *TFL1*, a shoot meristem identity gene, is expressed specifically in the shoot apical meristem (SAM) and represses the transition to flowering [13–16].

FT acting as a floral activator is widely conserved in plant species, although FT mRNA can be regulated by distinct mechanisms among different species even within long-day (LD) or short-day (SD) plant species [17]. Overexpression of FT orthologs, *Hd3a* and *RFT1*, generally showed an early-flowering phenotype, while mutations in FT led to a late flowering phenotype in rice [18–20]. Similarly, many functional FT orthologs were characterized, e.g. *GmFT2a* and *GmFT5a* in soybean (*Glycine max*) [21–22], *ZCN8* in maize (*Zea Mays*) [23–24], *SFT* in tomato (*Solanum lycopersicum*) [25], *TaFT* in wheat (*Triticum aestivum*) [26], *HvFT* in barley (*Hordeum vulgare*) [27], *PnFT1/2* in Pharbitis (*Pharbitis nil*) [28], *HaFT1* and *HaFT4* in

sunflower (*Helianthus annuus*) [29]. In sugar beet, two *FT* orthologs *BvFT1* and *BvFT2* act antagonistically. *BvFT2* is functionally conserved with *FTs* from other plants and is essential to activate flowering. In contrast, *BvFT1* represses flowering and is crucial for the vernalization response in sugar beets [30].

It is generally accepted that the clock-controlled *CO-FT* external coincidence mechanism is conserved in higher plants. However, each plant species has evolved its own unique mechanisms to induce flowering under optimal conditions. In rice, *Hd1*, an ortholog of *CO*, promotes flowering under SD conditions, while another rice *CO*-like gene, *Ghd7*, acts as a floral repressor under LD conditions and suppresses the transcription of *Ehd1*, a floral activator of multiple flowering signals [20,31–32]. In barley, *HvCO9*, an ortholog of *CO*, acts as a negative regulator of flowering under non-inductive SD conditions. In Pharbitis, *PnFT* mRNA abundance was not related to *PnCO* expression [28]. It was reported *Lotus japonicas* (a model legume) might lack the upstream positive regulator *CO* [33]. In pea (*Pisum sativum*), *COLa* is the most homologous gene, but is not the ortholog to *AtCO* in terms of the function. The diurnal expression rhythm of *COLa* under long days is more similar to *Arabidopsis COL1* and *COL2* [34], which have little effect on flowering time [35], and the expression of *COLa* is not obviously altered in *late1* mutants (*LATE1* is an ortholog of *Arabidopsis GIGANTEA*) [34], while in *Arabidopsis AtCO* expression is constantly dampened in *gi-2* mutants [36]. In soybean, the maturity gene *E1*, which has the most prominent effect on flowering time and photoperiod sensitivity, is a legume-specific gene [37]. Hence, it is speculated that there might be significant differences in the mechanisms of flowering time regulation between legume and the model species *Arabidopsis/ric*e.

“Photoperiodism” in soybean was discovered in 1920, but the molecular mechanism is poorly understood. Soybean is typically a short-day (SD) photoperiod-sensitive plant: flowering is induced when the daylength becomes shorter than a critical length. Each soybean cultivar is generally restricted to a very narrow range of latitudes due to photoperiod sensitivity. Flowering time and maturity in soybean are important quantitative traits that contribute to photoperiod adaptability, domestication, and productivity.

To date, eight flowering time or maturity loci, designated *E1* to *E8* [38–45], along with the *J* locus for the long juvenile period trait, with which soybean flowers late even under short days (SDs) [46], have been characterized genetically. Of these, *E1*, *E3*, and *E4* are involved in photoperiod responses [40–41,44,47–49]. *E3* and *E4* encode homologs of the photoreceptor phytochrome A (PHYA) [50–52]. *E2* encodes a homolog of *GIGANTEA* (*GI*) [53], a key regulator of photoperiodic flowering in *Arabidopsis* that functions upstream of *CO* and *FT* [36,54]. *E1* encodes a legume-specific protein, which contains a putative bipartite nuclear localization signal, a region distantly related to DNA-binding B3 domain and a helix–turn–helix structure, and might function as a transcription factor [37]. In addition, two of the *FT* homologs, *GmFT2a* and *GmFT5a* are responsible for inducing flowering under short-day conditions [22–23]. *GmFT2a* and *GmFT5a* are regulated by PHYA: Functional *E3* and *E4* genotypes suppressed the expression of *GmFT2a* and *GmFT5a* under long-day conditions and delayed flowering, whereas double-recessive *e3e4* genotypes induced *GmFT2a* and *GmFT5a* expression and promoted early flowering regardless of day length [22–23].

In our previous study, we proposed that *E1* is a part of the phytochrome A signaling pathway and antagonistically determines the expression level of *GmFT2a* and *GmFT5a* [37]. Long-days (LDs) are necessary for the induction of *E1* expression, whereas loss-of-function alleles at *E3* or *E4* can result in some degree of

suppression of the *E1* transcription and correspondingly elevated *GmFT2a* and *GmFT5a* expression. When a functional *E1* gene was transformed into the early-flowering cultivar Kariyutaka, transgenic plants overexpressing *E1* displayed late flowering and suppression of *GmFT2a* and *GmFT5a* transcript levels, indicating that the transcript level of *E1* was negatively correlated with that of *GmFT2a* and *GmFT5a*, but positively with flowering time.

In this study, we found the transcript level of *FT* ortholog *GmFT4* (*Glyma08g47810*) in soybean was strongly up-regulated in transgenic soybean overexpressing *E1*, and is tightly associated with *E1* or *e1-as* expression in soybean cultivars. Ectopic expression analysis in *Arabidopsis* demonstrated that *GmFT4* acts as a flowering repressor. The diurnal rhythm and tissue-organ expression pattern of *GmFT4* were also analyzed. Taken together, we propose that *GmFT4* is a key regulator in the *E1* mediated photoperiodic flowering pathway, and soybean has developed its unique pathway to control flowering through coordinated regulation between the flowering promoters *GmFT2a/GmFT5a* and repressor *GmFT4*.

## Materials and Methods

### Plant Materials and Growth Conditions

Soybean cultivars Kariyutaka, HeiNong48, Mufeng7, HN112, HN89, HX3, *E1* near-isogenic line Harosoy-*E1* and Harosoy-*e1*, Jack, Jinlin35, Sidou11, Yanhuang3 and Sakamotowase were used. Kariyutaka, HeiNong48, Mufeng7 and Sakamotowase are photoperiod-insensitive cultivars and flower early under both SDs and LDs. HN112, HN89, HX3, Jack, Jinlin35, Sidou11 and Yanhuang3 are photoperiod-sensitive cultivars and flower late under LDs. HX3 exhibits the long juvenile period trait, and flowers late even under SDs. Harosoy-*E1* and Harosoy-*e1* are *E1* near-isogenic lines. Harosoy-*E1* carrying the dominant functional *E1* allele is a late flowering phenotype. Harosoy-*e1* carrying the recessive *e1* allele, with a single missense point mutation, demonstrates an early flowering phenotype. Plants were grown in an artificial climate chamber under either SDs (12 h:12 h light/dark) or LDs (16:8 h light/dark) at 28°C under a light fluency of 200–300  $\mu\text{mol m}^{-2} \text{S}^{-1}$ . On the 16th day after emergence, fully expanded trifoliolate leaves were sampled 4 h after dawn from three individual plants for real-time PCR analysis.

For diurnal rhythmic expression analysis, soybean cultivar Harosoy-*E1* was used. Soybean plants were kept under SDs (12 h of light) and LDs (18 h of light) for 16 days before being transferred into continuous light or dark conditions. Pieces of fully expanded trifoliolate leaves from three individual plants were sampled every 2 h starting at dawn under SD, LD and continuous light conditions, and sampled every 4 h under continuous dark conditions for real-time PCR analysis.

For tissue-organ analysis, soybean cultivars Kariyutaka, transgenic soybean overexpressing *E1* in Kariyutaka, Harosoy-*E1*, Harosoy-*e1* and HX3 under LDs were used. Three sets of unifoliolate leaves, unexpanded and fully expanded trifoliolate leaves, apical meristems, petioles, stems and flowers from three individual plants were sampled for real-time PCR analysis.

### RNA Isolation, cDNA Synthesis and Quantitative Real-time PCR Analysis

Total RNA from leaves, apical meristems, petioles and stems was extracted using TRIzol (Invitrogen, Carlsbad, CA, USA) method and total RNA from flowers was extracted using TransZol plant (TransGen, Beijing, China) according to the manufacturer’s instructions. The RNA was treated with RNase-free recombinant DNase I (Takara, Dalian, China). The integrity of the RNA was

checked electrophoretically and quality assessment of total RNA was checked with NanoDrop™ ND-2000 c Spectrophotometer (Thermo Scientific, Wilmington, DE, USA). The isolated RNA was then subjected to reverse transcription using the SuperScript™ III Reverse Transcriptase kit.

Quantitative real-time PCR was performed on each cDNA sample with the SYBR Green Master Mix (TransStart Top Green qPCR SuperMix, Beijing, China) on chromo4 real-time PCR detection system (Bio-Rad, USA) according to the manufacturer's protocol. The measured Ct values were converted to relative copy-numbers using the  $\Delta\Delta C_t$  method. Amplification of *TUA5* was used as an internal control to normalize all data. Primers used were *TUA5*(Glyme05g29000.1)-F 5'-TGCCACCATCAAGACTAAGAGG-3' and *TUA5*-R 5'-ACCACCAGGAACAACA-GAAGG-3'; *GmFT4*-F 5'-TTGGATCCCTTCACGAGTTC-3' and *GmFT4*-R 5'-TCCCTAGGTCATTTCCACGA-3'; *GmFT2a*-F 5'-ATCCCGATGCACCTAGCCCA-3' and *GmFT2a*-R 5'-ACACCAAACGATGAATCCCCA-3'; *GmFT5a*-F 5'-AGCCCCAACCCCTTCAGTAGGGA-3'; *GmFT5a*-R 5'-GGTGATGACAGTGTCTCTGCCCA-3'; *E1*-F 5'-CACTCAATTAAGCCCTTCA-3'; *E1*-R 5'-TTCATCTCCTTTCATTTTGTG-3'; To enable statistical analysis, three fully independent biological replicates were obtained and subjected to real-time PCR run in triplicate. Raw data were standardized as described previously [55].

### Sequence Alignment and Phylogenetic Analysis

Protein sequences of *GmFT4* and its homologs were obtained from NCBI or Phytosome and were aligned using Clustal X2 (protein weight matrix using the Gonnet Series with a gap penalty of 10.00, a gap length penalty of 0.20, and a delay-divergent cutoff of 30%), and phylogenetic analysis was performed by using MEGA4 with the UPGMA method and 500 bootstrap iterations.

### Ectopic Expression of *GmFT4* in *Arabidopsis*

The coding region sequence of *GmFT4* from *E1* overexpression transgenic lines was first cloned into the pGEM®-T Easy vector (Promega, Madison, WI, USA) with the primer pair (5'-CTATATCAATGGACCCCTTGTTTC-3') and (5'-AA-GAAGGGTCTTCATCTCCTTCG-3'). *GmFT4* coding region was then PCR amplified from pGEM®-T-*GmFT4* vector with primers pair (5'-**GGCTTAAUAATGGACCCCTTGTTCTT**-3') and (5'-**GGTTTAAUGGTCTTCATCTCCTTCGTC**-3'), which contained a tail of 8 nt (marked as **Bold fonts**) in addition to the sequence specific to the target DNA fragment. The sequence was inserted into the pCAMBIA230035Su vector with the USER™ cloning technique [56], driven by the cauliflower mosaic virus 35 S promoter, with *NptII* as the selectable marker. *Arabidopsis* Col-0 plants were transformed by the floral dip method [57]. Transformants were selected on 1/2 MS medium containing 50 mg/L kanamycin. Seeds from each T<sub>1</sub> plant were individually collected. Selected T<sub>2</sub> plants were propagated, and homozygous overexpression lines were confirmed by semi-quantitative RT-PCR analysis using a gene specific primer pair of 5'-ATG-GACCCCTTGTTCTTGGAC-3' and 5'-TCATCTCCTTCGTCACCCCA-3'.

### Flowering Time Measurements of Transgenic *Arabidopsis*

*Arabidopsis* plants were grown in soil in an artificial climate chamber under long-day conditions (16:8 h light/dark) at 22°C to 24°C with 60% relative humidity. Flowering time was recorded when the floral bolt was 1 cm high, meanwhile the total number of rosette leaves were counted. About ninety plants were measured and subjected to statistical analysis.

## Results

### *GmFT4* Expression was Up-regulated in Transgenic Soybean Overexpressing *E1*

In our previous study, when *E1* was overexpressed in soybean cultivar Kariyutaka, expression levels of *GmFT2a* and *GmFT5a* were decreased in the transgenic soybean compared with the wild-type [37]. We further investigated expression of other *FT* homologs in transgenic and wild-type soybean, and found that the expression of *GmFT4*, a homolog of *FT*, was increased in transgenic soybean lines SOV#L1, SOV#L2 and SOV#L3 compared with that of SVC(transformed vector only) and wild-type (Figure 1). Since *GmFT4* showed an expression pattern opposite to *GmFT2a* and *GmFT5a*, further analysis of *GmFT4* was performed in order to understand the functional role of *GmFT4* in controlling flowering time.

### *GmFT4* was Grouped within the FT-like Clade and Carries Functionally Important FT Signatures

FT/TFL1 family members that have been functionally characterized from a wide range of monocotyledonous and dicotyledonous plant species were collected and subjected to phylogenetic analysis (Figure 2A). The results indicated that *GmFT4* was grouped into the FT-like clade. Sequence alignment was also conducted (Figure 2B). Tyr85(Y) in FT and the corresponding His88 (H) in TFL1 that lie at the entrance to the ligand-binding pocket have been identified to be important for the functional diversification between FT and TFL1 [58]. Also, a 14-amino-acid external loop and a 3-amino-acid triad have also been reported to be critical for FT/TFL function determination [59]. This 14-amino-acid segment and triad segment evolves very rapidly in TFL1 orthologs, but kept almost unchanged in FT orthologs. The key residue at 140 which lies in the external loop segment unambiguously distinguishes FT [Gln140 (Q)] from TFL1 homologs [Asp144(D)]. As shown in Figure 2B, the functionally determinant residues for the FT clade in the *GmFT4* protein are Tyr81(Y) and Gln146(Q). When compared with that of other FT proteins, the VYN triad is relatively invariable, however, the 14-amino-acid external loop in *GmFT4* protein is more variable.

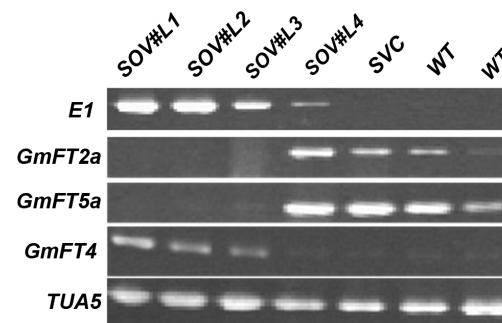

**Figure 1. Expression analysis of FT-like genes in transgenic soybean overexpressing *E1* and WT plants under LDs.** Fully expanded trifoliolate leaves were sampled 4 h after dawn for semi-quantitative RT-PCR. SOV#L1, SOV#L2 and SOV#L3 were T<sub>2</sub> transgenic plants from transgenic T<sub>0</sub> line TG4, that has three copy exogenous *E1* insertions. SOV#L4 was T<sub>2</sub> transgenic plant from transgenic T<sub>0</sub> line TG2, that has 7–8 copy exogenous *E1* insertions [37]. SVC, transformation vector only (i.e., vector control); WT, Kariyutaka. The *TUA5* gene was used as a control.  
doi:10.1371/journal.pone.0089030.g001



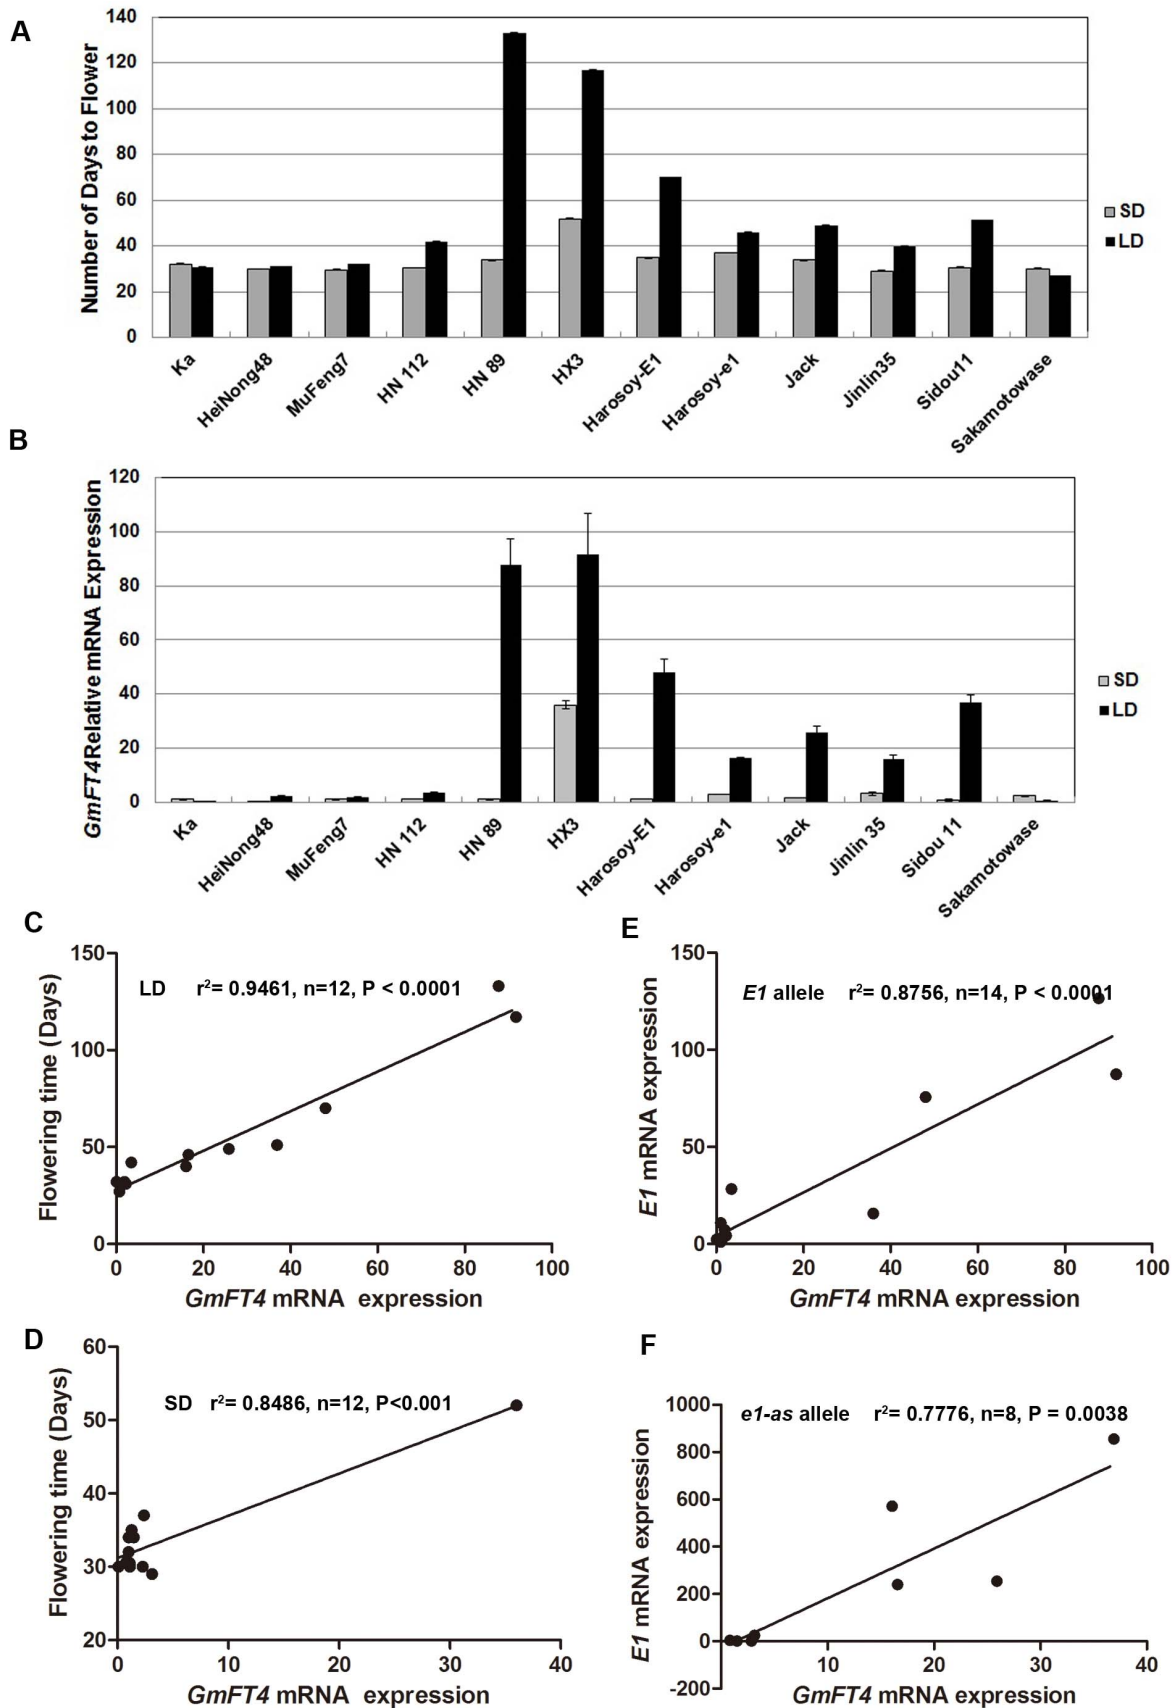

**Figure 3. Expression analysis of *GmFT4* in different soybean cultivars under SDs and LDs by real-time RT-PCR. (A) Number of days to flowering. (B) Evaluation of *GmFT4* transcript levels in fully expanded trifoliolate leaves by real-time RT-PCR. Transcript levels relative to *TUA5* were**



represented in each treatment; Soybean cultivar Kariyutaka under SDs was used as control. Values represent means of three biological replicates; error bars indicate standard deviation. (C and D) Correlation analysis between *GmFT4* mRNA and flowering time of different soybean cultivars under LDs and SDs. Results showed that *GmFT4* mRNA expression was significantly correlated with flowering time of different soybean cultivars under both SDs and LDs. (E and F) Correlation analysis between *GmFT4* mRNA expression and *E1* mRNA expression in cultivars carrying *E1* allele and cultivars carrying *e1-as* allele. *GmFT4* expression is significantly correlated with the *E1* expression in cultivars carrying both *E1* allele and cultivars carrying *e1-as* allele.

doi:10.1371/journal.pone.0089030.g003

### Expression of *GmFT4* Exhibits a Diurnal Rhythm under LDs

The diurnal rhythm of *GmFT4* gene expression was analyzed by real-time PCR in trifoliolate leaves sampled from cultivar Harosoy-*E1*. In plants under LDs, the expression level of *GmFT4* exhibits a diurnal rhythm. Briefly, the expression level increased beginning at dawn, reached a maximum 4 h later, then began to decrease and reached its minimum at the end of the light phase. In the dark phase, expression level of *GmFT4* began to increase again until 4 h after dawn in the next light/dark cycle (Figure 4A).

When plants grown under LDs were transferred to subsequent 48 h continuous dark (LD-DD) condition, the oscillation waveform was similar to that under LDs, but expression peak of *GmFT4* appeared 4 h later than that under LDs in the first subjective cycle, and the expression peak drifted later by 4 h further in the second subjective cycle of darkness (Figure 4A). When plants grown under LDs were transferred to subsequent 48 h continuous light (LD-LL) condition, the expression waveform of *GmFT4* kept a similar pattern during the first subjective cycle of continuous light, but there was a sharp increase at the end of the first subjective cycle (Figure 4A). During the second subjective cycle of continuous light, basal expression level of *GmFT4* was generally elevated, but the rhythm became somewhat irregular.

In plants exposed to SDs, expression of *GmFT4* was very low and irregular (Figure S1). However, transcript level of *GmFT4* was increased after the shift to continuous light (SD-LL) (Figure 4B). The expression of *GmFT4* kept rising during the first 24 h of continuous light, and there was a large and sharp increase at the

end of subjective cycle (Figure 4B). During the next subjective cycle of continuous light, the high expression level of *GmFT4* was maintained for a period, and then similarly there was a sharp increase at the end. By contrast, expression of *GmFT4* was kept at a very low level under continuous dark following SDs (SD-DD) (Figure 4B) and showed no circadian rhythm (Figure S1). The results indicated that the maintenance of expression rhythm of *GmFT4* needs a light/dark cycle, and a light phase can elevate the basal expression level.

### *GmFT4* Expressed Primarily in Leaves

We analyzed transcription profiles of *GmFT4* in various tissues in near-isogenic lines Harosoy-*E1* and Harosoy-*e1*, cultivars Kariyutaka and HX3 (carrying *J* locus) under LDs by real-time PCR (Figure 5). The expression of *E1* was generally tissue-specific, with high levels in mature leaves (fully expanded unifoliolate leaves and trifoliolate leaves), relatively low expression levels in flowers, and very low but nearly identical levels in apical meristems, petioles and stems (Figure 5A). The expression levels of *GmFT4* in fully expanded unifoliolate leaves, trifoliolate leaves and flowers in the late flowering cultivar HX3 were higher than that in the corresponding tissues of the early flowering cultivar Kariyutaka. Also higher expression level of *GmFT4* in fully expanded unifoliolate leaves, fully expanded trifoliolate leaves and flowers was observed in Harosoy-*E1* than that in Harosoy-*e1*.

We further concurrently analyzed the expression level of *E1* and *GmFT4* in various tissues in *E1* overexpression transgenic soybean plants and wild type (Kariyutaka). As shown in Figure 5B,

**Table 1.** *GmFT4* expression is associated with flowering time, *E1* genotype and *E1* expression.

| Cultivar or NIL    | Flowering time average±s.d.(days) |          | <i>GmFT4</i> relative expression average±s.d. |             | <i>E1</i> genotype | <i>E1</i> relative expression average±s.d. |              |
|--------------------|-----------------------------------|----------|-----------------------------------------------|-------------|--------------------|--------------------------------------------|--------------|
|                    | SD                                | LD       | SD                                            | LD          |                    | SD                                         | LD           |
| Kariyutaka         | 32±0.25                           | 30±0.11  | 1.00±0.11                                     | 0.10±0.01   | <i>E1</i>          | 1.00±0.17                                  | 2.33±0.25    |
| Heinong 48         | 30±0.15                           | 31±0.13  | 0.10±0.01                                     | 2.26±0.33   | <i>E1</i>          | 2.33±0.22                                  | 4.26±0.33    |
| MuFeng 7           | 30±0.25                           | 32±0.09  | 1.12±0.15                                     | 1.94±0.24   | <i>E1</i>          | 1.57±0.15                                  | 7.16±0.82    |
| HN112              | 31±0.15                           | 42±0.11  | 1.10±0.12                                     | 3.48±0.24   | <i>E1</i>          | 2.98±0.12                                  | 28.3±0.93    |
| HN89               | 34±0.25                           | 133±0.13 | 1.02±0.31                                     | 87.73±9.53  | <i>E1</i>          | 10.78±1.32                                 | 126.53±6.57  |
| HX3                | 52±0.15                           | 117±0.09 | 36.00±1.41                                    | 91.77±14.83 | <i>E1</i>          | 15.73±1.43                                 | 87.42±4.83   |
| Harosoy- <i>E1</i> | 35±0.28                           | 70±0.11  | 1.27±0.04                                     | 48.01±5.09  | <i>E1</i>          | 1.83±0.11                                  | 75.7±7.46    |
| Harosoy- <i>e1</i> | 37±0.16                           | 46±0.13  | 2.83±0.12                                     | 16.56±0.15  | <i>e1-as</i>       | 1.97±0.13                                  | 240.83±8.55  |
| Jack               | 34±0.25                           | 49±0.09  | 1.47±0.04                                     | 25.89±2.33  | <i>e1-as</i>       | 1.27±0.14                                  | 254.22±13.41 |
| Jilin 35           | 29±0.26                           | 40±0.21  | 3.12±0.45                                     | 16.06±1.44  | <i>e1-as</i>       | 25.15±2.45                                 | 571.78±25.44 |
| Sidou 11           | 31±0.25                           | 51±0.11  | 0.82±0.31                                     | 36.91±2.75  | <i>e1-as</i>       | 4.84±1.31                                  | 855.05±19.74 |
| Sakamotowase       | 30±0.25                           | 27±0.13  | 2.27±0.040                                    | 0.76±0.044  | <i>e1-fs</i>       | 0.26±0.04                                  | 6.36±0.64    |

Plants were grown in a climate chamber under either SDs (12 h:12 h light/dark) or LDs (16:8 h light/dark). Fully expanded trifoliolate leaves were sampled 4 h after beginning of light phase from three individual plants. Relative expression level of *GmFT4* and *E1* were analyzed by real-time RT-PCR. Transcript levels relative to *TUAS* are represented in each treatment, s.d. represents standard deviation. Soybean cultivar Kariyutaka under SDs was used as control whose expression level was set to 1 for all genes analyzed. Values represent means of three biological replicates. Genotype *E1* is considered as functional WT allele, the *e1-as* allele represents a partially functional allele and the *e1-fs* alleles are nonfunctional allele.

doi:10.1371/journal.pone.0089030.t001

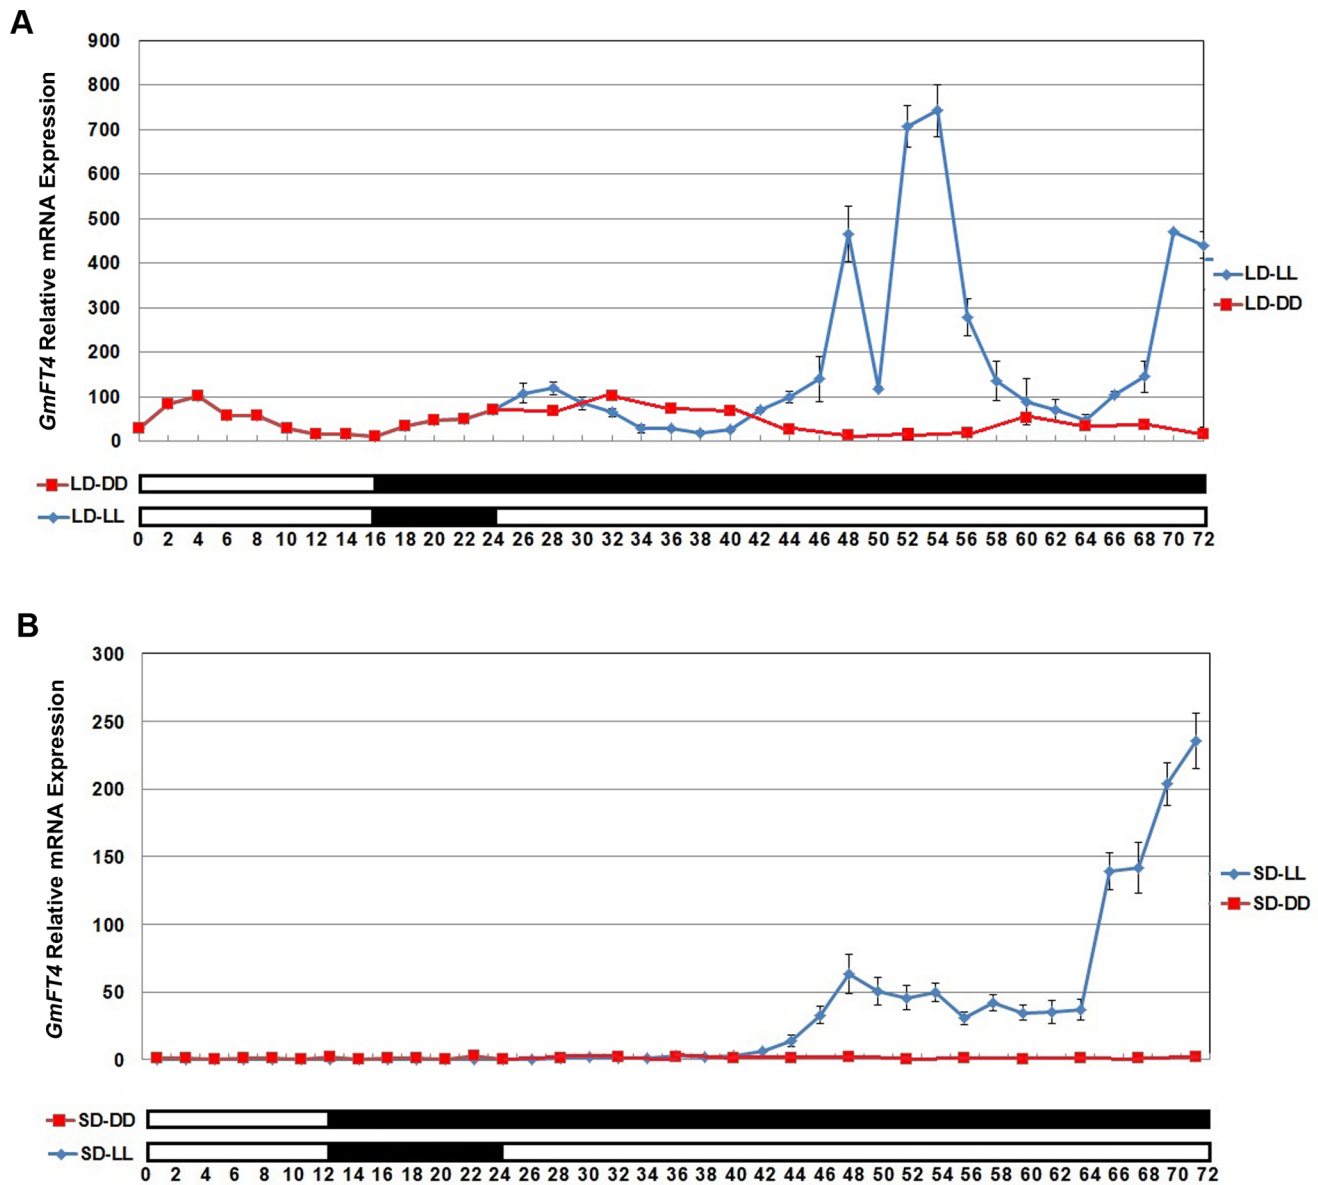

**Figure 4. Diurnal expression pattern of *GmFT4* in Harosoy-*E1* fully expanded trifoliolate leaves. (A)** *GmFT4* expression pattern in plants grown under long days (18:6 h light/dark regime) followed by 48 h of continuous dark (LD-DD) or continuous light (LD-LL). **(B)** *GmFT4* expression pattern in plants grown under short days (12:12 h light/dark regime) followed by 48 h of continuous dark (SD-DD) or continuous light (SD-LL). Transcript levels relative to *TUA5* are represented in each treatment; 2 h after beginning of the light phase under SD were used as control. Values represent means of three biological replicates; error bars indicate standard deviation. Leaves were sampled every 2 h under long days, short days and continuous light, every 4 h under continuous dark.  
doi:10.1371/journal.pone.0089030.g004

although an extremely high expression level of *E1* was observed in all tissues analyzed in transgenic soybean overexpressing *E1*, *GmFT4* was only highly induced in leaves (including fully expanded unifoliolate leaves and trifoliolate leaves) and slightly induced in flowers of the transgenic soybean (Figure 5C), implying that *GmFT4* may function primarily in leaves, and the induction of *GmFT4* by *E1* is conditioned by other genetic or molecular factors that are primarily present in leaves.

#### Ectopic Expression of *GmFT4* in *Arabidopsis* Delayed Flowering

In order to further understand the function of *GmFT4* in flowering regulation, we conducted an ectopic overexpression experiment in *Arabidopsis* ecotype Columbia (Col-0). T<sub>3</sub> homozygous lines were obtained and were confirmed by semi-quantitative RT-PCR with gene-specific primers. As shown in Figure 6A, four transgenic *Arabidopsis* lines all exhibited high expression levels of *GmFT4*, and no expression was detected in wild-type or vc (transformation vector only) transgenic plants.

Transgenic *Arabidopsis* with overexpression of *GmFT4* flowered later than the wild-type and vc plants under LDs (Figure 6B).

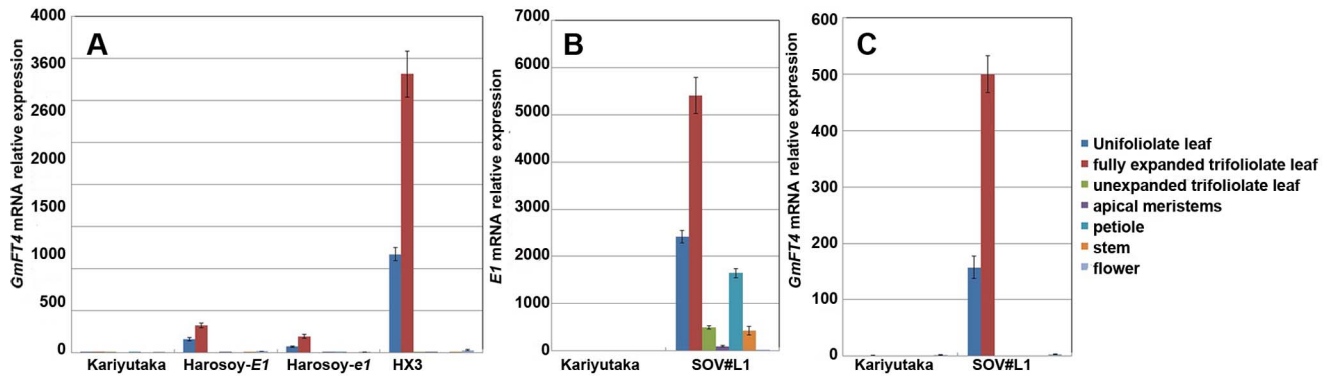

**Figure 5. Tissue-organ expression analysis of *GmFT4* in different soybean cultivars.** All tissues were sampled 2 h after beginning of the light phase under LDs for real-time RT-PCR analysis. Transcript levels relative to *TUA5* are represented in each treatment. Values represent means of three biological replicates; error bars indicate standard deviation. (A) Tissue-specific organ expression analysis of *GmFT4* in soybean cultivars Kariyutaka, Harosoy-*E1*, Harosoy-*e1* and HX3. (B) Tissue-organ expression analysis of *E1* in *E1* overexpressing transgenic soybean and WT (Kariyutaka). (C) Tissue-organ expression analysis of *GmFT4* in *E1* overexpressing transgenic soybean and WT (Kariyutaka). doi:10.1371/journal.pone.0089030.g005

Wild-type *Arabidopsis* and vc plants needed only 27–29 days to flower on average, while *GmFT4* overexpression lines needed 36–37 days to flower under LDs (Figure 6C). When flowering, wild-type *Arabidopsis* and vc plants had 11–12 rosette leaves on average, while *GmFT4* overexpression lines had 14–15 rosette leaves on average (Figure 6D). Obviously, the phenotype of transgenic *Arabidopsis* overexpressing *GmFT4* was distinct from that of other soybean flowering promoting *FT* homologs, *GmFT2a/5a* [21].

## Discussion

Each soybean cultivar is agronomically adapted to a narrow range of latitude for their maximal yield due to photoperiod sensitivity, thus limiting widely distribution of elite soybean cultivars. Among the major maturity genes or QTLs that have been reported so far, the *E1* gene has the most prominent effect on flowering time and photoperiod sensitivity in soybean [48,60–62], suggesting *E1* is a key regulator of flowering in soybean. Phylogenetic analysis on protein sequence indicated *E1* is

legume-specific [37], implying that the major photoperiodic pathway in soybean might be different from that in *Arabidopsis* and rice. Negative correlation between *E1* and *GmFT2a/GmFT5a* expression was observed in our previous study [37]. Here, we found that a *FT* ortholog, *GmFT4*, was positively associated with *E1* in *E1* overexpressing transgenic soybean (Figure 1), *E1* NILs and different soybean cultivars (Figure 3B). Interestingly, unlike most *FT*-like genes, *GmFT4* was characterized as a flowering repressor (Figure 6). These results indicated soybean has evolved a different strategy to regulate flowering time, and the *E1-GmFT4* pathway is valuable for understanding the molecular mechanisms of flowering time regulation in soybean.

*GmFT4* transcript level was strongly induced in *E1* overexpressing transgenic soybean lines (Figure 1), and Harosoy-*E1* showed a greater *GmFT4* transcriptional abundance than Harosoy-*e1* (Figure 3B). Allelic variations and transcriptional abundances of *E1* prominently influence *GmFT4* expression (Table 1). In addition, the expression pattern of *GmFT4* under SDs and LDs

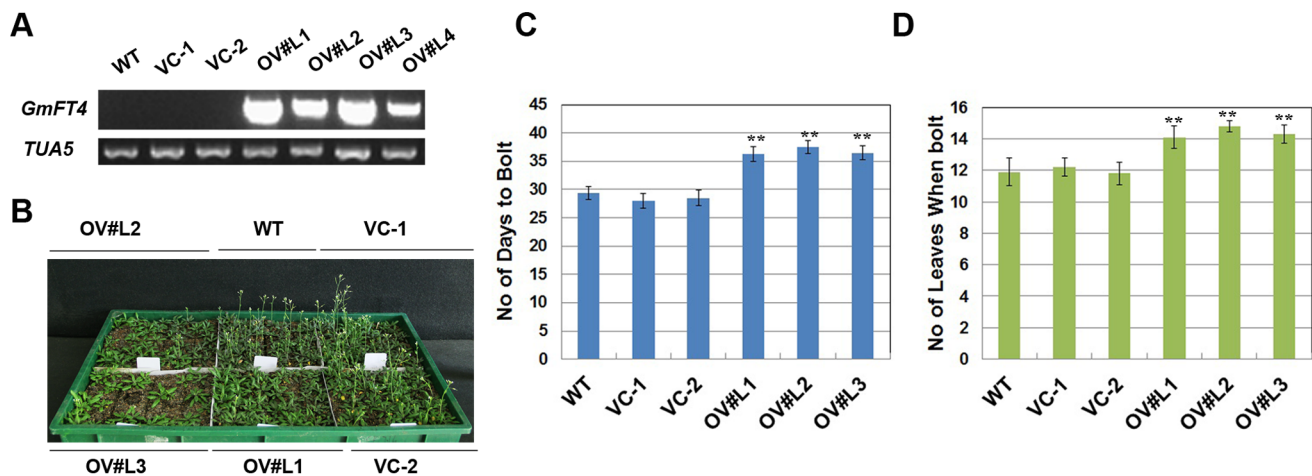

**Figure 6. Effect of ectopic expression analyses of *GmFT4* in *Arabidopsis*.** (A) Semi-quantitative RT-PCR analysis of transcript levels of *GmFT4* in four 35 S: *GmFT4* overexpression lines (OV#L1, OV#L2, OV#L3 and OV#L4). (B) Appearance of the indicated genotype plants 30 days after sowing under LD condition. (C) Flowering time measurement of the indicated plants. The time at which the main inflorescence shoot had elongated to 1 cm was recorded. (D) The number of rosette leaves when plants were flowering. Ninety plants were measured and averaged for each measurement and statistical analysis. doi:10.1371/journal.pone.0089030.g006



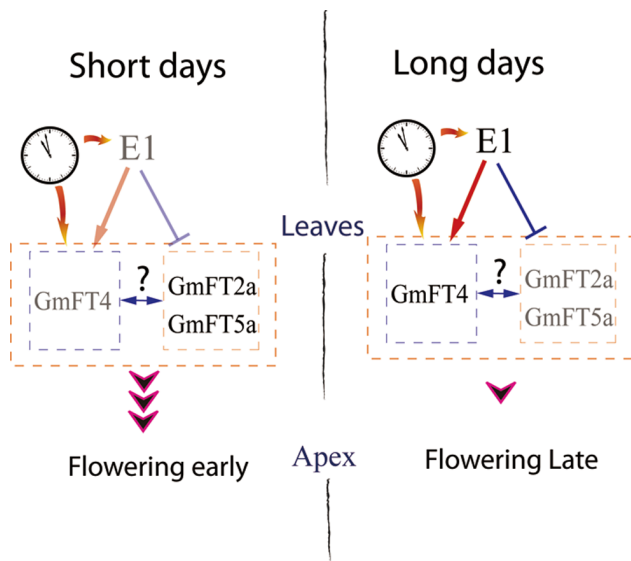

**Figure 7. A proposed *E1-GmFT4/GmFT2a/GmFT5a* regulation model in soybean.** (Some components and their positions were referred to Figure 7 of Xia et al [37].) Flowering repressor *GmFT4*, and flowering promoters *GmFT2a/GmFT5a* are all downstream of *E1*. *E1* positively regulates *GmFT4* transcription, but negatively regulates *GmFT2a/5a* transcription. The balance between the antagonistic FTs decides soybean flowering time. Arrows represent stimulation of the gene expression, T-shaped symbol represent inhibition of gene expression; The grayed out parts represent strength decline. doi:10.1371/journal.pone.0089030.g007

was similar to that of *E1* with a strong suppression under SDs and strong elevated expression under LDs (Figure 3B). *GmFT4* and *E1* have similar functions where both act as flowering repressors (Figure 6). All the results in this study indicate that *GmFT4* is regulated by *E1*, and *GmFT4* might be involved in the *E1* mediated flowering control pathway. However, *GmFT4* might be not the direct target of *E1*, since *E1* acts as a transcriptional repressor (data not shown).

In plants, the regulation of FTs in different species is highly diversified. Most FT-like genes are flowering activators and their induction occurs only in daylength that induce flowering. Not surprisingly, high *GmFT4* expression level in non-inductive LDs is consistent with its flowering repressing function. In *Arabidopsis* and rice, response to photoperiod is mediated by transcriptional regulation of FTs through an intersection between clock regulation and daylength. The expression of FT requires the activation of the clock output gene *CO* in the presence of light in *Arabidopsis* [10]. FT transcription is activated by *CO* under LDs but not under SDs, because under LDs, *CO* mRNA expression coincides with exposure of plants to light leading to stabilization of CO protein [9–10]. Here, we found that induction of *GmFT4* occurred in non-inductive daylength, and the diurnal oscillation expression pattern could be retained to some extent when transferred to subsequent 24 h continuous light or continuous dark, indicating that *GmFT4* was partly impacted by the circadian clock, and moreover that the induction of *GmFT4* required the exposure of plants to light, which indicated, just like other FT-like genes, transcriptional regulation of *GmFT4* also through an intersection between clock regulation and daylength.

Although *GmFT4* is preferably induced under LDs while *GmFT2a/5a* is preferably induced under SDs, the oscillation waveforms of *GmFT4* and *GmFT2a/5a* under respectively inductive conditions were similar, with an increase at the beginning of

dawn, a peak 4 h later, and a minimum toward dusk, and then followed by an increase again, suggesting that these genes might be regulated by a similar mechanism in relation to the circadian clock.

In plants, FTs are highly conserved in different species. *Arabidopsis* has been used for functional confirmation of genes cloned, especially for FT homologs from different species. *ZCN8* encodes a FT-related protein in a SD plant maize. Ectopic expression of *ZCN8* accelerated flowering in transgenic *Arabidopsis* [23]. An antagonistic pair of FT homologs, *BvFT1* and *BvFT2* controls flowering time in LD plant sugar beet. Transgenic expression of *BvFT2* in both *Arabidopsis* and sugar beet strongly promoted flowering, while transgenic expression of *BvFT1* strongly repressed flowering in both *Arabidopsis* and sugar beet [29]. Previous studies indicated that the functions of FT genes are conserved between *Arabidopsis* and soybean. Ectopic overexpression of *GmFT2a* and *GmFT5a* in *Arabidopsis* showed a flowering promoting phenotype [21–22]. Conversely, when *Arabidopsis* FT was transformed into soybean, transgenic soybean flowered earlier [63]. Accordingly, we used *Arabidopsis* to confirm the function of *GmFT4*. When *GmFT4* was overexpressed in *Arabidopsis*, transgenic *Arabidopsis* showed a delayed flowering phenotype (Figure 6).

*GmFT4* was grouped within the FT-like clade and carries functionally important FT signatures, but acts as a flowering repressor. Upon detailed analysis by referring to the previous publications, we predicted that the residue in position 143 that lies in the external loop may be critical for function diversification. Most FT-like proteins carry Gly(G) or Glu(E) residue in this position, except for flowering repressors *GmFT4* and *BvFT1* from *Beta vulgaris*. However, further evidence at molecular level is needed to verify this hypothesis.

Most soybean cultivars have a short-day requirement for floral induction, so under long days, flowering and maturing are delayed and differ greatly among different cultivars. Here, we found the transcriptional abundance of *GmFT4* is significantly correlated with the flowering time of different soybean cultivars under LDs, indicating that *GmFT4* might be related to the flowering time regulation under LDs. Soybean cultivars grown at high latitudes are often photoperiod insensitive, because soybean plants planted in spring are required to flower under LDs during early summer and complete seed production in the limited frost-free season. Photoperiod insensitive cultivars grown at high latitude, such as Kariyutaka, Heinong 48, MuFeng 7 and Sakamotowase displayed low levels of *GmFT4* expression. Even under SDs, transcriptional abundance of *GmFT4* was also significantly correlated with the flowering time of different soybean cultivars. At low latitudes, soybean cultivars with the classic response to photoperiod flower early resulting in short plants and low grain yield [64], so soybean cultivars bred at low latitudes often needs the long juvenile period trait that featured as delayed flowering under SDs [65–67]. In this study, cultivar HX3, known for the Brazilian long juvenile period trait exhibited a delayed flowering phenotype under SDs. Generally, cultivars with the long juvenile period trait need a SD regime of 8 h/16 h (light/dark) to promote flowering. Here, we found cultivar HX3 also showed a relatively high *GmFT4* expression even under SDs, indicating that *GmFT4* might be an important determinant for flowering time regardless of day-length conditions. We assume that *GmFT4* might contribute greatly to the wide adaptability of soybean to wide range of latitudes. Hence, we proposed a model for the flowering time regulation in soybean (Figure 7). In this model, all flowering promoters *GmFT2a* and *GmFT5a*, and repressor *GmFT4*, function downstream of *E1*, and the balance between the antagonistic FTs (*GmFT4* vs *GmFT2a/GmFT5a*) determines soybean flowering time. Under SDs or in

cultivars carrying nonfunctional *E1* alleles or devoid of *E1* expression, the expression of the flowering repressor *GmFT4* is very low except for cultivars carrying long juvenile trait, and the expression of flowering promoters *GmFT2a/5a* are high, leading to an initiation of the flowering process. Under LDs, the expression of flowering repressor *GmFT4* is high, while flowering promoters *GmFT2a/5a* are repressed, so the flowering process is delayed.

Taken together, we conclude that *GmFT4* is positively regulated by *E1* and functions as a flowering repressor in soybean. Considering that soybean transformation is particularly difficult and time-consuming, we did not employ a soybean transformation approach for functional confirmation. In the future, characterization of *GmFT4* in soybean using various approaches including transgenic soybean will be needed to confirm the function of *GmFT4*. Future examination of the functional mechanism of *GmFT4* will determine whether the *GmFT4* protein can move like other florigens from leaves to the shoot apical meristem and will shed light on the precise regulation of photoperiodic flowering pathway in soybean.

## References

- Corbesier L, Vincent C, Jang S, Fornara F, Fan Q, et al. (2007) FT protein movement contributes to long-distance signaling in floral induction of *Arabidopsis*. *Science* 316: 1030–1033.
- Jaeger KE, Wigge PA (2007) FT Protein Acts as a Long-Range Signal in *Arabidopsis*. *Curr Biol* 17: 1050–1054.
- Mathieu J, Warthmann N, Küttner F, Schmid M (2007) Export of FT Protein from Phloem Companion Cells Is Sufficient for Floral Induction in *Arabidopsis*. *Curr Biol* 17: 1055–1060.
- Tamaki S, Matsuo S, Wong HL, Yokoi S, Shimamoto K (2007) Hd3a protein is a mobile flowering signal in rice. *Science* 316: 1033–1036.
- Abe M, Kobayashi Y, Yamamoto S, Daimon Y, Yamaguchi A, et al. (2005) FD, a bZIP protein mediating signals from the floral pathway integrator FT at the shoot apex. *Science* 309: 1052–1056.
- Teper-Bamnolker P, Samach A (2005) The flowering integrator FT regulates *SEPALLATA3* and *FRUITFULL* accumulation in *Arabidopsis* leaves. *Plant Cell* 17: 2661–2675.
- Wigge PA, Kim MC, Jaeger KE, Busch W, Schmid M, et al. (2005) Integration of spatial and temporal information during floral induction in *Arabidopsis*. *Science* 309: 1056–1059.
- Samach A, Onouchi H, Gold SE, Ditta GS, Schwarz-Sommer Z, et al. (2000) Distinct roles of *CONSTANS* target genes in reproductive development of *Arabidopsis*. *Science* 288: 1613–1616.
- Suárez-López P, Wheatley K, Robson F, Onouchi H, Valverde F, et al. (2001) *CONSTANS* mediates between the circadian clock and the control of flowering in *Arabidopsis*. *Nature* 410: 1116–1120.
- Yanovsky MJ, Kay SA (2002) Molecular basis of seasonal time measurement in *Arabidopsis*. *Nature* 419: 308–312.
- Yamaguchi A, Kobayashi Y, Goto K, Abe M, Araki T (2005) *TWIN SISTER OF FT (TSF)* acts as a floral pathway integrator redundantly with *FT*. *Plant Cell Physiol* 46: 1175–1189.
- Takada S, Goto K (2003) *TERMINAL FLOWER2*, an *Arabidopsis* homolog of *HETEROCHROMATIN PROTEIN1*, counteracts the activation of *FLOWERING LOCUS T* by *CONSTANS* in the vascular tissues of leaves to regulate flowering time. *Plant Cell* 15: 2856–2865.
- Bradley D, Ratcliffe O, Vincent C, Carpenter R, Coen E (1997) Inflorescence commitment and architecture in *Arabidopsis*. *Science* 275: 80–83.
- Ohshima S, Murata M, Sakamoto W, Ogura Y, Motoyoshi F (1997) Cloning and molecular analysis of the *Arabidopsis* gene *Terminal Flower 1*. *Mol Gen Genet* 254: 186–194.
- Ratcliffe OJ, Amaya I, Vincent CA, Rothstein S, Carpenter R, et al. (1998) A common mechanism controls the life cycle and architecture of plants. *Development* 125: 1609–1615.
- Shannon S, Meeks-Wagner DR (1991) A mutation in the *Arabidopsis TFL1* gene affects inflorescence meristem development. *Plant Cell* 3: 877–892.
- Turk F, Fornara F, Coupland G (2008) Regulation and identity of florigen: *FLOWERING LOCUS T* moves center stage. *Annu Rev Plant Biol* 59: 573–594.
- Kojima S, Takahashi Y, Kobayashi Y, Monma L, Sasaki T, et al. (2002) *Hd3a*, a rice ortholog of the *Arabidopsis FT* gene, promotes transition to flowering downstream of *Hd1* under short-day conditions. *Plant Cell Physiol* 43: 1096–1105.
- Komiya R, Ikegami A, Tamaki S, Yokoi S, Shimamoto K (2008) *Hd3a* and *RFT1* are essential for flowering in rice. *Development* 135: 767–774.
- Komiya R, Yokoi S, Shimamoto K (2009) A gene network for long-day flowering activates *RFT1* encoding a mobile flowering signal in rice. *Development* 136: 3443–3450.
- Kong F, Liu B, Xia Z, Sato S, Kim BM, et al. (2010) Two coordinately regulated homologs of *FLOWERING LOCUS T* are involved in the control of photoperiodic flowering in soybean. *Plant Physiol* 154: 1220–1231.
- Sun H, Jia Z, Cao D, Jiang B, Wu C, et al. (2011) *GmFT2a*, a Soybean Homolog of *FLOWERING LOCUS T*, Is Involved in Flowering Transition and Maintenance. *Plos one* 6: e29238.
- Lazakis CM, Coneva V, Colasanti J (2011) *ζCN8* encodes a potential orthologue of *Arabidopsis FT* florigen that integrates both endogenous and photoperiod flowering signals in maize. *J Exp Bot* 62: 4833–4842.
- Meng X, Muszynski MG, Danilevskaia ON (2011) The *FT*-like *ζCN8* gene functions as a floral activator and is involved in photoperiod sensitivity in maize. *Plant Cell* 23: 942–960.
- Lifschitz E, Eviatar T, Rozman A, Shalit A, Goldshmidt A, et al. (2006) The tomato *FT* ortholog triggers systemic signals that regulate growth and flowering and substitute for diverse environmental stimuli. *Proc Natl Acad Sci U S A* 103: 6398–6403.
- Yan L, Fu D, Li C, Blechl A, Tranquilli G, et al. (2006) The wheat and barley vernalization gene *VRN3* is an orthologue of *FT*. *Proc Natl Acad Sci U S A* 103: 19581–19586.
- Faure S, Higgins J, Turner A, Laurie DA (2007) The *FLOWERING LOCUS T*-like gene family in barley (*Hordeum vulgare*). *Genetics* 176: 599–609.
- Hayama R, Agashe B, Luley E, King R, Coupland G (2007) A circadian rhythm set by dusk determines the expression of *FT* homologs and the short-day photoperiodic flowering response in *Pharbitis*. *Plant Cell* 19: 2988–3000.
- Blackman BK, Strasburg JL, Raduski AR, Michaels SD, Riesberg LH (2010) The Role of Recently Derived *FT* Paralogs in Sunflower Domestication. *Curr Biol* 20: 629–635.
- Pin PA, Benlloch R, Bonnet D, Wremmerth-Weich E, Kraft T, et al. (2010) An antagonistic pair of *FT* homologs mediates the control of flowering time in sugar beet. *Science* 330: 1397–1400.
- Doi K, Izawa T, Fuse T, Yamanouchi U, Kubo T, et al. (2004) *Ehd1*, a B-type response regulator in rice, confers short-day promotion of flowering and controls *FT*-like gene expression independently of *Hd1*. *Gene Dev* 18: 926–936.
- Xue W, Xing Y, Weng X, Zhao Y, Tang W, et al. (2008) Natural variation in *Ghd7* is an important regulator of heading date and yield potential in rice. *Nat Genet* 40: 761–767.
- Yamashino T, Yamawaki S, Hagui E, Ueoka-Nakanishi H, Nakamichi N, et al. (2013) Clock-controlled and *FLOWERING LOCUS T (FT)*-dependent photoperiodic pathway in *Lotus japonicus* I: verification of the flowering-associated function of an *FT* homolog. *Biosci Biotechnol Biochem* 77: 747–753.
- Hecht V, Knowles CL, Vander Schoor JK, Liew LC, Jones SE, et al. (2007) Pea *LATE BLOOMER1* is a *GIGANTEA* ortholog with roles in photoperiodic flowering, deetiolation, and transcriptional regulation of circadian clock gene homologs. *Plant Physiol* 144: 648–661.
- Ledger S, Strayer C, Ashton F, Kay SA, Putterill J (2001) Analysis of the function of two circadian-regulated *CONSTANS-LIKE* genes. *Plant J* 26: 15–22.
- Sawa M, Kay SA (2011) *GIGANTEA* directly activates *Flowering Locus T* in *Arabidopsis thaliana*. *Proc Natl Acad Sci U S A* 108: 11698–11703.
- Xia Z, Watanabe S, Yamada T, Tsubokura Y, Nakashima H, et al. (2012) Positional cloning and characterization reveal the molecular basis for soybean

## Supporting Information

**Figure S1** Diurnal expression pattern of *GmFT4* in plants grown in SDs followed by continuous dark. 2 h after beginning of the light phase under SD were used as control. Values represent means of three biological replicates; error bars indicate standard deviation. Fully expanded trifoliolate leaves from Harosoy-*E1* were sampled every 2 h under short days, and every 4 h under continuous dark.

(DOC)

## Acknowledgments

We would like to thank Cober ER from Agric. & Agri-Food Canada, Harada K from National Institute of Agrobiological Sciences and Ning J from Michigan State University for language editing.

## Author Contributions

Conceived and designed the experiments: HZ ZJX. Performed the experiments: HZ SXL SL HYW XZZ. Analyzed the data: HZ ZJX. Contributed reagents/materials/analysis tools: BHL FJK XHY JL. Wrote the paper: HZ.

- maturity locus *E1* that regulates photoperiodic flowering. *Proc Natl Acad Sci U S A* 109: E2155–E2164.
38. Bernard R (1971) Two major genes for time of flowering and maturity in soybeans. *Crop Sci* 11: 242–244.
  39. Bonato ER, Vello NA (1999) *E6*, a dominant gene conditioning early flowering and maturity in soybeans. *Genet Mol Biol* 22: 229–232.
  40. Buzzell R (1971) Inheritance of a soybean flowering response to fluorescent-daylength conditions. *Can J Genet Cytol* 13: 703–707.
  41. Buzzell RI, Voldeng HD (1980) Inheritance of insensitivity to long daylength. *Soybean Genet Newsl* 7: 26–29.
  42. Cober ER, Molnar SJ, Charette M, Voldeng HD (2010) A new locus for early maturity in soybean. *Crop Sci* 50: 524–527.
  43. Cober ER, Voldeng HD (2001) A New Soybean Maturity and Photoperiod-Sensitivity Locus Linked to *E1* and *T*. *Crop Sci* 41: 698–701.
  44. McBlain B, Bernard R, Cremeens C, Korczak J (1987) A procedure to identify genes affecting maturity using soybean isolate testers. *Crop Sci* 27: 1127–1132.
  45. Saindon G, Beversdorf W, Voldeng H (1989) Adjustment of the soybean phenology using the *E4* locus. *Crop Sci* 29: 1361–1365.
  46. Ray JD, Hinson K, Mankono J, Malo MF (1995) Genetic control of a long-juvenile trait in soybean. *Crop Sci* 35: 1001–1006.
  47. Abe J, Xu D, Miyano A, Komatsu K, Kanazawa A, et al. (2003) Photoperiod-insensitive Japanese soybean landraces differ at two maturity loci. *Crop Sci* 43: 1300–1304.
  48. Cober E, Tanner J, Voldeng H (1996a) Genetic control of photoperiod response in early-maturing, near-isogenic soybean lines. *Crop Sci* 36: 601–605.
  49. Cober E, Tanner J, Voldeng H (1996b) Soybean photoperiod-sensitivity loci respond differentially to light quality. *Crop Sci* 36: 606–610.
  50. Franklin KA, Quail PH (2010) Phytochrome functions in *Arabidopsis* development. *J Exp Bot* 61: 11–24.
  51. Liu B, Kanazawa A, Matsumura H, Takahashi R, Harada K, et al. (2008) Genetic redundancy in soybean photoresponses associated with duplication of the phytochrome A gene. *Genetics* 180: 995–1007.
  52. Watanabe S, Hideshima R, Xia Z, Tsubokura Y, Sato S, et al. (2009) Map-based cloning of the gene associated with the soybean maturity locus *E3*. *Genetics* 182: 1251–1262.
  53. Watanabe S, Xia Z, Hideshima R, Tsubokura Y, Sato S, et al. (2011) A map-based cloning strategy employing a residual heterozygous line reveals that the *GIGANTEA* gene is involved in soybean maturity and flowering. *Genetics* 188: 395–407.
  54. David KM, Armbruster U, Tama N, Putterill J (2006) *Arabidopsis* GIGANTEA protein is post-transcriptionally regulated by light and dark. *FEBS Lett* 580: 1193–1197.
  55. Willems E, Leyns L, Vandesompele J (2008) Standardization of real-time PCR gene expression data from independent biological replicates. *Anal Biochem* 379: 127–129.
  56. Nour-Eldin HH, Hansen BG, Norholm MH, Jensen JK, Halkier BA (2006) Advancing uracil-excision based cloning towards an ideal technique for cloning PCR fragments. *Nucleic Acids Res* 34: e122–e122.
  57. Clough SJ, Bent AF (1998) Floral dip: a simplified method for *Agrobacterium*-mediated transformation of *Arabidopsis thaliana*. *Plant J* 16: 735–743.
  58. Hanzawa Y, Money T, Bradley D (2005) A single amino acid converts a repressor to an activator of flowering. *Proc Natl Acad Sci U S A* 102: 7748–7753.
  59. Ahn JH, Miller D, Winter VJ, Banfield MJ, Lee JH, et al. (2006) A divergent external loop confers antagonistic activity on floral regulators FT and TFL1. *EMBO J* 25: 605–614.
  60. Watanabe S, Tajuddin T, Yamanaka N, Hayashi M, Harada K (2004) Analysis of QTLs for reproductive development and seed quality traits in soybean using recombinant inbred lines. *Breeding Sci* 54: 399–407.
  61. Xu M, Xu Z, Liu B, Kong F, Tsubokura Y, et al. (2013) Genetic variation in four maturity genes affects photoperiod insensitivity and PHYA-regulated post-flowering responses of soybean. *BMC plant biol* 13: 91.
  62. Yamanaka N, Ninomiya S, Hoshi M, Tsubokura Y, Yano M, et al. (2001) An informative linkage map of soybean reveals QTLs for flowering time, leaflet morphology and regions of segregation distortion. *DNA Res* 8: 61–72.
  63. Yamagishi N, Yoshikawa N (2011) Expression of *FLOWERING LOCUS T* from *Arabidopsis thaliana* induces precocious flowering in soybean irrespective of maturity group and stem growth habit. *Planta* 233: 561–568.
  64. Carpentieri-Pipolo V, De Almeida LA, Ee SKiuhl R (2002) Inheritance of a long juvenile period under short-day conditions in soybean. *Genet Mol Biol* 25: 463–470.
  65. Cober ER (2011) Long Juvenile Soybean Flowering Responses under Very Short Photoperiods. *Crop Sci* 51: 140–145.
  66. Sinclair TR, Hinson K (1992) Soybean flowering in response to the long-juvenile trait. *Crop Sci* 32: 1242–1248.
  67. Tomkins JP, Shihe ER (1996) Soybean growth and agronomic performance in response to the long-juvenile trait. *Crop Sci* 36: 1144–1149.
